# Supplementary material for: Protein Kinase D1 Signaling in Cancer Stem Cells with Epithelial-Mesenchymal Plasticity
Source: MDPI journal article supplement (doi:10.3390/cells11233885), 2022-12-01
Supplement: s1 [file s1]

## Supplementary Figures and Figure Legends

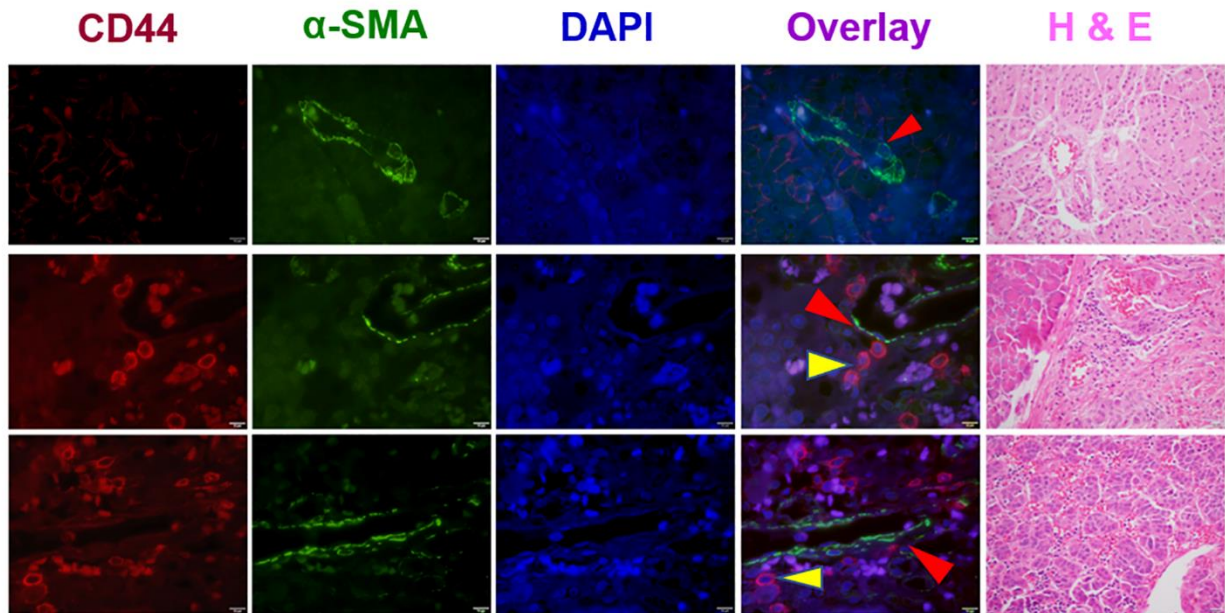

**Figure S1.** Stem-like phenotype of cancer cells in pNETs. **A.** A human pancreatic tissue control (top panel) and human pNET specimens from two individual patients (middle and lower panels) were co-stained with  $\alpha$ -SMA and CD44 antibodies followed by suitable secondary antibodies, and DAPI was used for staining the nuclei (blue). CD44-positive CSCs were marked by yellow arrowheads, which are close to the  $\alpha$ -SMA positive (green, red arrowheads) blood vessels. The fluorescence images were acquired by an immunofluorescence microscope equipped with a CCD camera. Representative images are shown along with H & E staining for tumor tissue structures. Bar = 10  $\mu$ m.

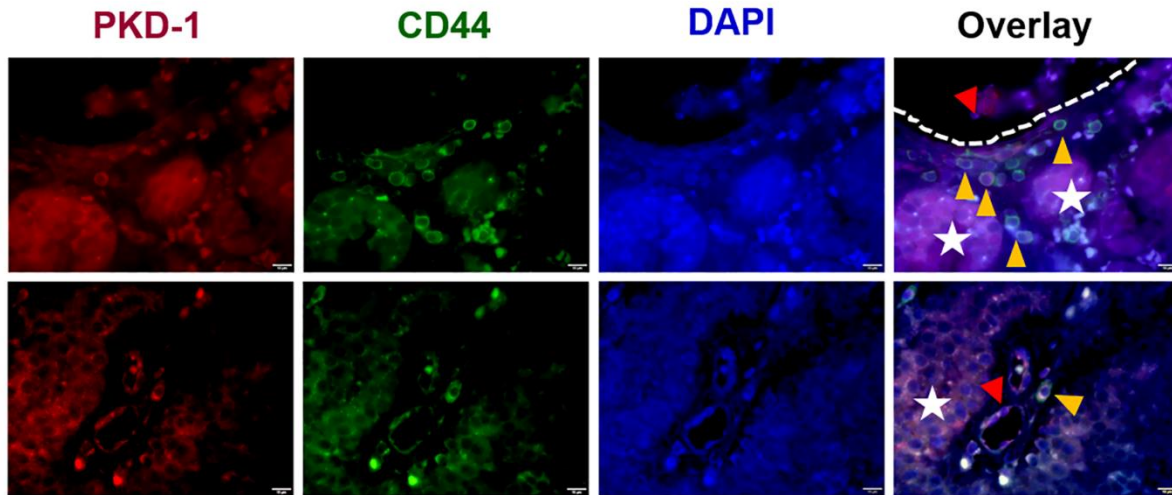

**Figure S2.** Distribution of CD44-positive and/or PKD-1-positive CSCs in human pNET tissues. Human pNET specimens were co-stained with CD44 antibodies and PKD1 antibodies followed by suitable secondary antibodies, with DAPI staining the nuclei (blue). CD44-positive (green), PKD1-positive (red) or both positive were observed under a fluorescence microscope. Cancer cells with greater levels of both CD44 and PKD-1 (yellow arrowheads) likely left the tumor nests (white stars) and accumulated in the nearby vascular lumen (red arrowheads). Fluorescence images were acquired by an immunofluorescence microscope equipped with a CCD camera. Shown are representative images from two individual patients. Bar = 10  $\mu$ m. **Note:** These are additional pictures for Figure 2A.

A

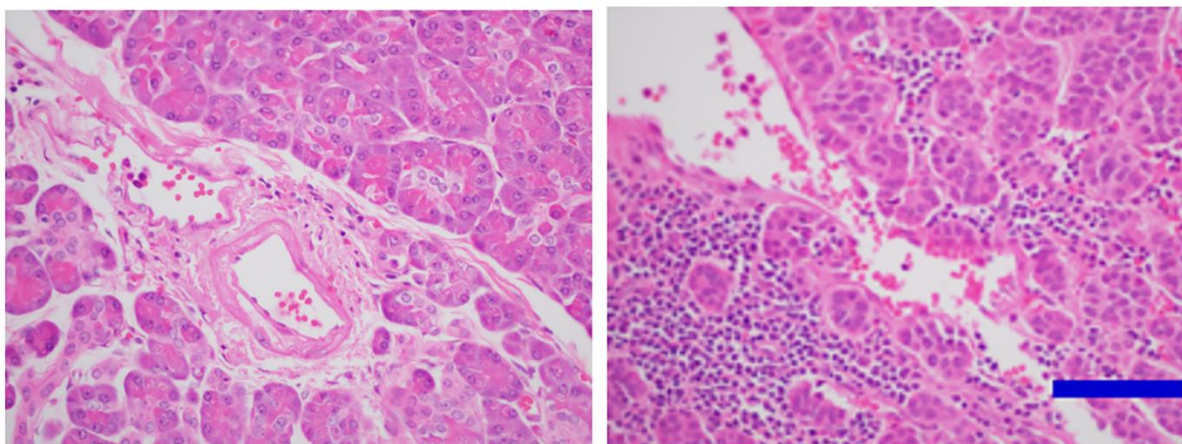

B

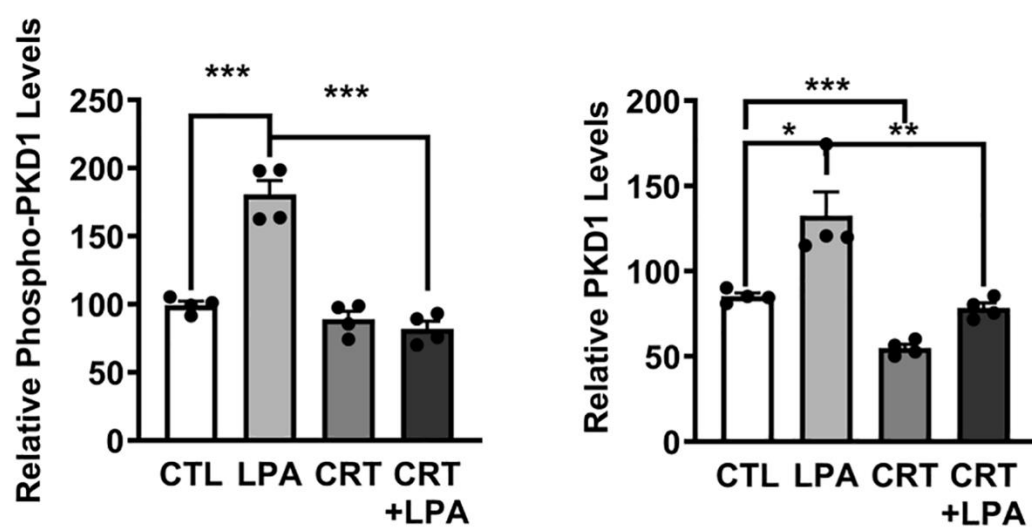

C

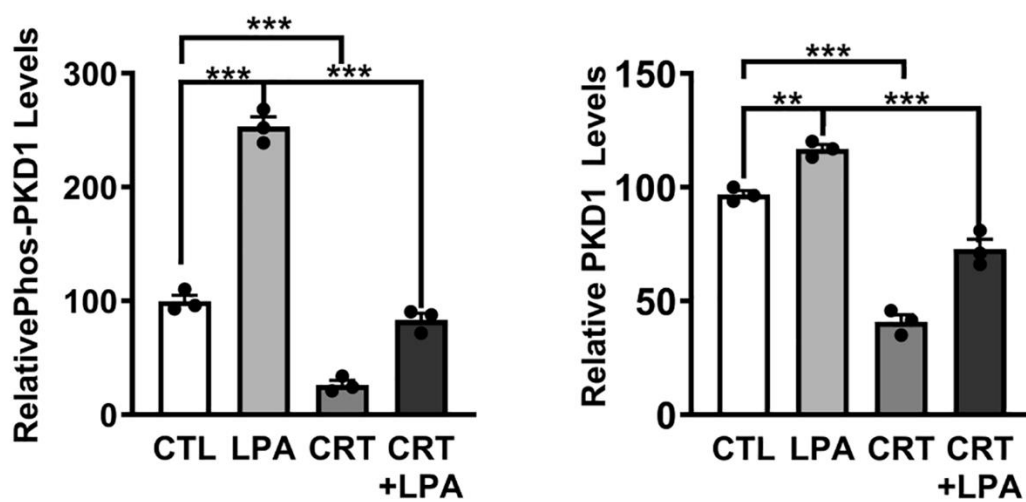

**Figure S3.** LPA activated PKD-1 signaling pathway in pNET cells. **A.** Representative H&E staining images to show the pattern, shape and structure of cells in the normal pancreatic tissue samples and pNET tissues. Scale bar = 50  $\mu$ m. BON cells (**B**) and QGP-1 cells (**C**) were exposed to the vehicle control, 10  $\mu$ M LPA, 2  $\mu$ M CRT0066101, or their combinations after 24 hours. Cell lysates were extracted and the expressions of phosphorylated and total PKD-1 were detected by Western blots. Shown are the relative expression levels assessed by densitometry using an NIH Image J. Triplicate experiments were performed, and the results are shown as mean  $\pm$  SEM. \* $P$  < 0.05, \*\* $P$  < 0.01, and \*\*\* $P$  < 0.001.

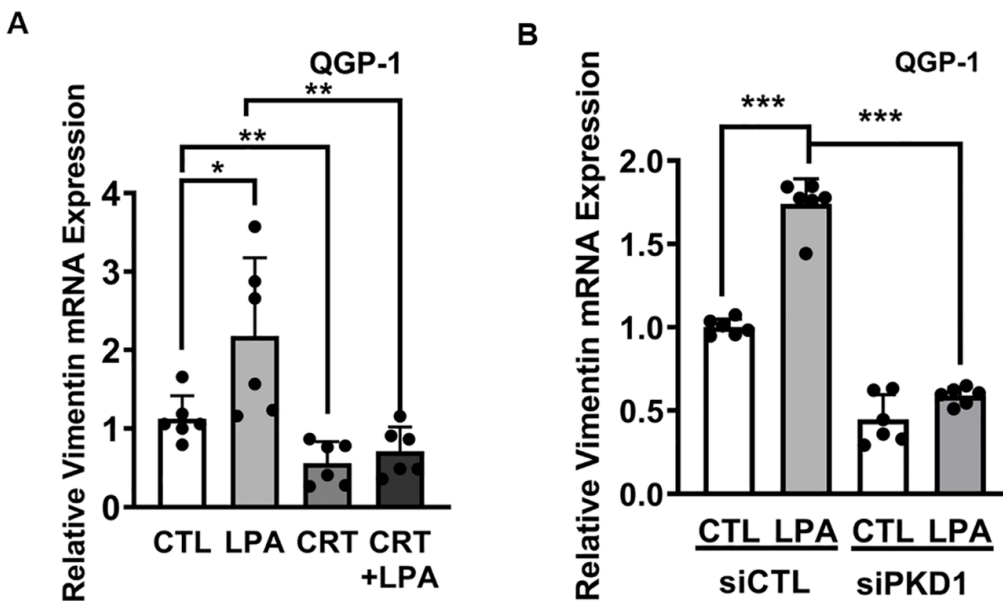

**Figure S4.** PKD-1 on vimentin expression in pNET cells. **A.** QGP-1 cells were treated with 10  $\mu$ M LPA, or 2  $\mu$ M CRT0066101, or combination of both in medium (serum-free) for 24 hours. RNA was extracted to detect mRNA levels of vimentin by RT-qPCR. **B.** Control and siPKD-1 transfected QGP-1 cells were treated with 10  $\mu$ M LPA for 24 hours. Total RNA was extracted for RT-qPCR to determine the mRNA expression of vimentin. Triplicate experiments were performed and the results were shown as the mean  $\pm$  SEM. \* $P$  < 0.05, \*\* $P$  < 0.01, and \*\*\* $P$  < 0.001.

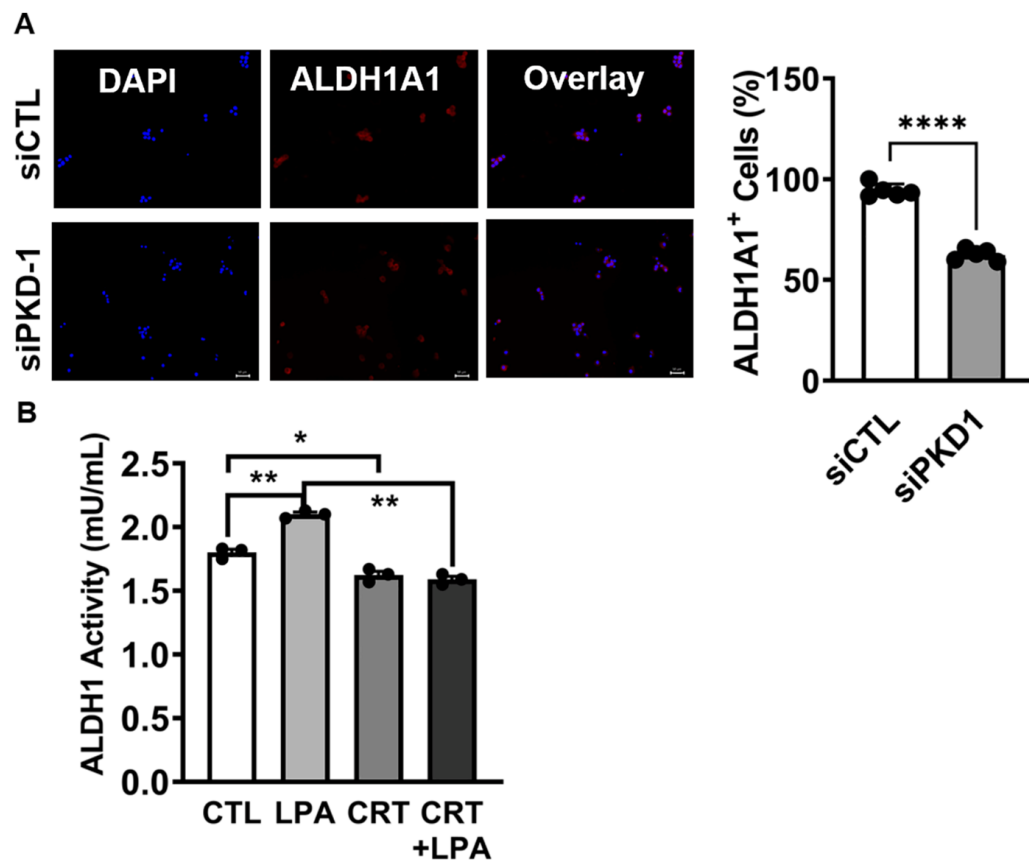

**Figure S5.** Role of PKD-1 signaling in the regulation of ALDH1 activity and expression in pNET cells. **A.** PKD-1 siRNA transfected QGP-1 cells were incubated with antibody (ALDH1A1) followed by appropriate secondary antibody. The cells with greater levels of ALDH1A1 expression were observed and the ratio of ALDH1A1-high cells were calculated under a fluorescence microscope by counting to 100 cells randomly in each field. Fluorescence images were acquired by an immunofluorescence microscope equipped with a CCD camera, and representative images are shown. Five repetitions were performed and the statistic difference was calculated using GraphPad Prism 9.  $***P < 0.001$ . **B.** QGP-1 cells were treated with 10  $\mu$ M LPA, 2  $\mu$ M CRT0066101, or their combination for 24 hours. ALDH1 activity was measured by ELISA in a plate reader. Unpaired student's t test was used for statistical differences.  $*P < 0.05$  and  $**P < 0.01$ .

**Table S1. Antibody Information for Western Blots (WB)**

| <b>Antibody Name</b> | <b>Company</b> | <b>Catalog Number</b> | <b>Species</b> | <b>Dilution</b> |
|----------------------|----------------|-----------------------|----------------|-----------------|
| Phospho-PKD-1        | Cell Signaling | 2051                  | rabbit         | 1:1000          |
| PKD-1                | Cell Signaling | 90039                 | rabbit         | 1:1000          |
| Vimentin             | Cell Signaling | 46173                 | rabbit         | 1:1000          |
| $\beta$ -actin       | Sigma          | A5441                 | mouse          | 1:5000          |
| CD36                 | abcam          | ab133625              | rabbit         | 1:5000          |

**Immunofluorescence (IF)**

| <b>Antibody Name</b> | <b>Company</b> | <b>Catalog Number</b> | <b>Species</b> | <b>Dilution</b> |
|----------------------|----------------|-----------------------|----------------|-----------------|
| CD44                 | Cell signaling | 37259                 | rabbit         | 1:200           |
| CD44                 | Cell signaling | 5640                  | mouse          | 1:200           |
| $\alpha$ -SMA        | Sigma          | A2547                 | mouse          | 1:400           |
| CD45                 | Thermo         | 14-9457-80            | mouse          | 1:200           |
| PKD-1                | Sigma          | SAB4502371            | rabbit         | 1:200           |
| Vimentin             | Cell Signaling | 5741                  | rabbit         | 1:200           |
| ALDH1A1              | R&D Systems    | AF5869                | goat           | 1:200           |

**Immunohistochemistry (IHC)**

| <b>Antibody Name</b> | <b>Company</b> | <b>Catalog Number</b> | <b>Species</b> | <b>Dilution</b> |
|----------------------|----------------|-----------------------|----------------|-----------------|
| E-Cadherin           | Cell signaling | 3195                  | rabbit         | 1:200           |
| N-Cadherin           | Cell signaling | 13116                 | rabbit         | 1:200           |
| Vimentin             | Cell signaling | 5741                  | rabbit         | 1:200           |
